## RESEARCH ARTICLE

## Household food insecurity risk indices for English neighbourhoods: Measures to support local policy decisions

Dianna M. Smith<sup>1,2</sup>\*, Lauren Rixson<sup>1</sup>, Grace Grove<sup>2,3</sup>, Nida Ziauddeen<sup>2,3</sup>, Ivaylo Vassilev<sup>4</sup>, Ravita Taheem<sup>5</sup>, Paul Roderick<sup>2,3</sup>, Nisreen A. Alwan<sup>2,3,6</sup>

**1** School of Geography and Environmental Science, University of Southampton, Southampton, United Kingdom, **2** NIHR Applied Research Collaboration Wessex, Southampton, United Kingdom, **3** School of Primary Care, Population Sciences and Medical Education, Faculty of Medicine, University of Southampton, Southampton, United Kingdom, **4** School of Health Sciences, Faculty of Environmental and Life Sciences, University of Southampton, Southampton, United Kingdom, **5** Southampton City Council, Southampton, United Kingdom, **6** NIHR Southampton Biomedical Research Centre, University of Southampton and University Hospital Southampton NHS Foundation Trust, Southampton, United Kingdom

\* These authors contributed equally to this work.

\* [d.m.smith@soton.ac.uk](mailto:d.m.smith@soton.ac.uk)

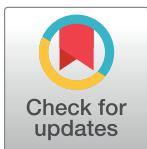

## OPEN ACCESS

**Citation:** Smith DM, Rixson L, Grove G, Ziauddeen N, Vassilev I, Taheem R, et al. (2022) Household food insecurity risk indices for English neighbourhoods: Measures to support local policy decisions. PLoS ONE 17(12): e0267260. <https://doi.org/10.1371/journal.pone.0267260>

**Editor:** Angelo Moretti, Utrecht University: Universiteit Utrecht, NETHERLANDS

**Received:** April 4, 2022

**Accepted:** November 25, 2022

**Published:** December 9, 2022

**Copyright:** © 2022 Smith et al. This is an open access article distributed under the terms of the [Creative Commons Attribution License](https://creativecommons.org/licenses/by/4.0/), which permits unrestricted use, distribution, and reproduction in any medium, provided the original author and source are credited.

**Data Availability Statement:** The data underlying the results presented in the study are available from <https://mylocalmap.org.uk/iaahealth/>.

**Funding:** This research was funded by the National Institutes of Health Research Applied Research Collaboration (NIHR ARC) Wessex for the project Wessex FRIEND, awarded to DMS and NAA.

**Competing interests:** The authors have declared that no competing interests exist.

## Abstract

## Background

In England, the responsibility to address food insecurity lies with local government, yet the prevalence of this social inequality is unknown in small subnational areas. In 2018 an index of small-area household food insecurity risk was developed and utilised by public and third sector organisations to target interventions; this measure needed updating to better support decisions in different settings, such as urban and rural areas where pressures on food security differ.

## Methods

We held interviews with stakeholders ( $n = 14$ ) and completed a scoping review to identify appropriate variables to create an updated risk measure. We then sourced a range of open access secondary data to develop an indices of food insecurity risk in English neighbourhoods. Following a process of data transformation and normalisation, we tested combinations of variables and identified the most appropriate data to reflect household food insecurity risk in urban and rural areas.

## Results

Eight variables, reflecting both household circumstances and local service availability, were separated into two domains with equal weighting for a new index, the Complex Index, and a subset of these to make up the Simple Index. Within the Complex Index, the Compositional Domain includes population characteristics while the Structural Domain reflects small area access to resources such as grocery stores. The Compositional Domain correlated well with free school meal eligibility ( $r_s = 0.705$ ) and prevalence of childhood obesity ( $r_s = 0.641$ ). This

domain was the preferred measure for use in most areas when shared with stakeholders, and when assessed alongside other configurations of the variables. Areas of highest risk were most often located in the North of England.

## Conclusion

We recommend the use of the Compositional Domain for all areas, with inclusion of the Structural Domain in rural areas where locational disadvantage makes it more difficult to access resources. These measures can aid local policy makers and planners when allocating resources and interventions to support households who may experience food insecurity.

## Introduction

### Food insecurity and health

Hunger and poverty feature prominently in the Sustainable Development Goals, outlining the need to end both experiences globally by 2030 [1]. Although the focus may traditionally be on Low- and Middle-Income Countries (LMIC), these aims are also relevant for High Income Countries (HIC), such as the UK. UK Stakeholders for Sustainable Development in 2019 pointed to the high levels of household food insecurity in the UK compared to the rest of Europe [2]. Here, the term food insecurity reflects the inability of an individual or household to access food of sufficient nutritional quality and quantity using socially acceptable options. Instead, they may need to access high interest loans, or food aid such as food banks—or go hungry [3]. The term is sometimes used interchangeably with food poverty to reflect the perspective that people who are experiencing food insecurity often do so because of economic constraints, and it is desirable to include ‘poverty’ in the term to capture this lack of income. Current data place UK household food insecurity prevalence at 8% of households pre-pandemic [4] and up to 9.7% during the pandemic [5].

Food insecurity is a problem that is not easily addressed due to many contributing factors—income, location, personal circumstances which put pressure on resources—and the anticipated solutions which are largely focused on supporting personal income. Conceptually, the causes of and solutions to food insecurity in households have predominantly focused on the cost and availability of food, drawing on ideas of food deserts and food ladders. Food deserts have a long history in the UK with contested definitions around spatial access to affordable, healthy food (see [6]). In contrast, possible solutions to household (and community) food insecurity are described as ladders, with rungs to support households through direct and indirect interventions ranging from free at point of use food banks to development of community food systems [7].

While healthcare is provided by the state in the UK, and largely free at the point of use, food is not. The aim is for people who struggle to afford necessities such as food and housing to use the welfare system to increase their income to a level that enables them to at least meet basic needs. However, there is no requirement for the state to provide food in line with healthcare and housing (noting limited supply of state housing provision [8]). This has created a debate about the Right to Food and whether it should be enshrined in law across all nations of the UK [9]. Arguably, this most basic need should be equally protected as it is central to a person’s health and wellbeing. Although food is not within the remit of the government’s required provision such as housing and education, third sector responses to food insecurity such as food banks, the Holiday Activity Fund and voucher schemes during the 2020 lockdown,

community fridges and food pantries are often supported in part by local governments as part of their public health strategy. This is in the context of reduced income to local authorities and the impact of funding cuts which are geographically uneven [10].

What is absent for local governments is the data on household food insecurity *within* their local areas. This would enable allocation of increasingly stretched resources to the areas or populations where food insecurity is greatest, and was the motivation behind an earlier food insecurity risk measure in 2018 [11]. A place-focused measure was initially called for in 2013 as part of the terms of reference for the All Party Parliamentary Group on Hunger and Food Poverty [12]. Such data are necessary as following the devolution of public health resources to local governments with the 2012 Health and Social Care Act, the task to prioritise funding on the basis of population needs was shifted to local authorities [13]. Crucial to local decision making is reliable data on estimates of health outcomes or related social inequalities. The need for small area data is not limited to the UK and the methods presented here can be replicated in other settings, where local data are unavailable, to support planning and prioritisation of food aid resources.

Health inequalities are unevenly distributed in England, noted across decades of research. The inequalities can be measured in terms of life expectancy where there is lower population life expectancy in more deprived areas and in the North compared to the South of England [14–16]. This can be partly explained by differences in health including obesity prevalence [17] and mental health [18]. Overall health is typically better in rural populations in England [19], however, some outcomes show mixed results such as a higher risk of depression and anxiety in women [20]. Where health is worse in rural areas, access to healthcare services is a possible explanation.

Food insecurity contributes to both physical [21, 22] and mental health inequalities [23–25]. Specific health outcomes associated with food insecurity are obesity in adolescents [26] and women [27]. While it may seem surprising that lower food security is associated with obesity, this is due to the poorer quality of food consumed in households that are food insecure [28], partly due to the cost of a healthy diet [29]. In addition, food insecurity is linked to poor mental health including depression, with stronger evidence in women in particular [30]. One large study of 160 countries concluded that the negative mental health impacts of food insecurity were stronger in countries where food insecurity was not as frequent [31]. Smaller scale studies also demonstrate a relationship between poor mental health and food insecurity [32, 33].

The short and long-term health implications of food insecurity are not well assessed in the UK, in part because systematic measuring of food insecurity prevalence in the population only started in 2019 as part of the Family Resource Survey (FRS). This followed substantial campaigns by the third sector and academics [34, 35]. Results from the first FRS dataset indicated that in 2019/20, 5 million people (8%) were living in food insecure households [36]. Earlier data on food insecurity were captured in the Food and You Survey in 2004 and 2016 [37]. In this study of the two datasets collected 12 years apart, unemployment, low income and disability were all associated with severe food insecurity while younger age, non-white ethnicity and low educational attainment were also associated with food insecurity. Surveys conducted by the Food Foundation [38] during the 2020 Covid-19 pandemic, and as part of the longitudinal Understanding Society [39] study, provided further indications of who experiences food insecurity in the UK, noting associated health outcomes including mental wellbeing. A UK-level assessment of food insecurity using a slightly different survey measure identified similar socio-demographic risk factors, including people on lower incomes and those renting their homes [40]. Despite these recent efforts to collect more data on the extent of food insecurity in nations of the UK, a lack of consistently collected subnational, local data remains.

## Measures of risk

In the absence of prevalence data for a health outcome or social phenomenon, the estimated risk to the population is often predicted as a proxy measure; in 2020 this was demonstrated for diabetes in small areas of England [41]. Within the UK, area-based measures are used to aid the prioritisation of resources. The most commonly applied sociodemographic measure is the Index of Multiple Deprivation (IMD) [42] with the most recent release in 2019. This is a wide-ranging index with seven domains/groupings of variables (including income, crime, education, health) to reflect relative social and material deprivation at the scale of Lower Super Output Areas (LSOAs) across England. These small areas have populations of about 1500 and there are 32,844 in England. Similar indices exist for Scotland (Scottish Index of Multiple Deprivation) and Wales (Welsh Index of Deprivation) for small areas [43, 44]. Often these indices of deprivation are used as shorthand for poverty or (inaccurately) as proxy indicators of individual socioeconomic status for residents [45]. They provide a useful tool for local government organisations who are tasked with planning and distribution of resources for their local populations. The IMD offers a good general indicator of relative deprivation with supplemental indices focused on older people and children, however, they include 39 indicators across the 2019 Indices of Deprivation, many of which are based on data prior to 2019 [46]. When poor health is associated with social and material deprivation, these deprivation measures offer a reasonable proxy for risk of ill health in local populations, and are used in individual level risk scores for poor health (see QDScore [47]). For more specific purposes, the IMD may be overly complex when the researcher is interested in one outcome, such as disordered eating, which may not be easily predicted by a composite measure with so many variables (or one of the constituent domains). An additional challenge is the risk of multicollinearity between variables in a regression analysis, for example using the overall IMD values as well as distance to food stores when exploring predictors of excess weight. There is scope for bespoke area-based measures of population characteristics, health and risk to support local governments with planning for health and social care, and for third sector organisations for locating interventions such as food aid.

There have been efforts in recent years to develop targeted area-based indicators of health risk and deprivation, to better reflect the experiences of specific populations or to focus on selected concerns such as diabetes. In response to an awareness that the 'standard' English IMD measures did not reflect rural populations, Burke and Jones developed an index of rural deprivation [48] which was welcomed by local governments in the East of England as an improved assessment of their populations' challenges. This measure included more variables on the role of service access, which comprises less than 10% of the standard IMD [46]. Two other measures explored the environment rather than population characteristics. The first, devised in 2010, created a measure of environmental deprivation related to health for the UK [49] and included hypothesised health promoting and health damaging characteristics of the natural environment including air pollution, UV radiation and green spaces. The resulting index, Multiple Environmental Deprivation Index (MEDIX) may be used similarly to the IMD. This measure is shown to be associated with mortality across the UK, demonstrating the relevance of measures which are focussed on specific aspects of localities [50].

Further development in this area of research is a UK-based classification of local environments to understand the potential impacts of place on population health, the Access to Healthy Assets and Hazards (AHAH) index. In AHAH, LSOAs are categorised based on access to a range of amenities and natural environments which are described as potentially beneficial or detrimental to health [51]. AHAH incorporates variables across domains of access to health services, retail outlets and environmental quality. A substantial benefit of AHAH is that the

data are all freely available to researchers. AHAH was found to be associated with mental well-being, though not associated with self-rated health or limited long term illness [51].

In addition to the earlier version of local area food insecurity risk developed in 2018 for England, two further measures were developed which estimate food insecurity in the UK. The first makes use of machine learning approaches to model food insecurity based on users from the Ollo food sharing app [52]. This measure took the demographic profiles of users who asked for food and applied machine learning to a sample of 421 app users for training and testing algorithms, which formed the basis of further models. Area data in this model included proximity to food stores, bus stops and food banks. This risk measure was created at LSOA level but at the time of writing the data are not freely accessible. A challenge with these data is the reliance on the small sample of app users which may over-represent a unique population who are unlikely to be active outside of urban areas where food sharing is more accessible or feasible.

A local authority level model was devised from data collected by the Food Foundation (n = 4231 survey respondents) in January 2021 which applied small-area estimation methods to estimate differing levels of food insecurity and hunger [53]. This application of estimation approaches is novel in modelling food insecurity, with the benefit of confidence intervals around the estimates to reflect uncertainty in the estimates. Modelled data are available to download or in map format, enhancing accessibility for colleagues working in the national government or policy. These data represent the prevalence of people estimated to be hungry, to struggle or who worry about food. Like the AHAH data and the previous food insecurity risk measure, the availability of these data is a strength of the research. The main limitation is the scale of the estimates at local authority level (343 are present in England, in contrast to 32,844 LSOAs), which are beneficial for national or regional level prioritisation, however, finer scale estimates are needed within local government.

## Aim

The aim of this study is to develop an updated measure of food insecurity risk for small areas in England [11] using data which are open access and enabling users to differentiate risk between broad area types (urban and rural). The existing measures are based on larger geographic areas that may not allow for sufficient targeting of interventions and are based on small samples of survey data or limited variables. Further, we explore the options for measures which can reflect the different pressures on food security experienced by people living in urban or rural areas such as cost of living or access to employment. A benefit of this updated measure is the engagement with stakeholders to gain insight into factors that may influence food insecurity in populations and their feedback on the new risk data. The methodological approach is outlined and the patterns in the resulting measure(s) described. The level of agreement between this risk measure and related measures or outcomes at LSOA and Middle Super Output Area (MSOA) (typical population of 7000) levels is included for validation.

## Materials and methods

The process of developing a new version of food insecurity risk measures (hereafter the Complex Index) was informed through a scoping/literature review, semi-structured interviews and follow up discussions with stakeholders in Wessex (Hampshire, Southampton, Portsmouth, Dorset, Isle of Wight), England.

## Qualitative data collection and initial scoping

Interviewed stakeholders included people working in food banks, schools and local government. Stakeholders were invited to reflect on the demographic characteristics of people seeking

food aid and the areas in which they were most likely to live within a local authority. All initial interviews were held between November 2020 and February 2021. Interviews were intended to identify prevailing characteristics of people experiencing food insecurity and seeking help with accessing food due to economic constraints, although not all people who identify as food insecure access food aid formally [54], and to offer feedback on maps created using the previous measure. There were follow up group meetings and emails when the new measures were prepared to gather feedback on maps of the new measures, and how well they reflected the observed populations at risk from the perspective of stakeholders.

Interviewees were identified through our existing contacts in local government teams across Wessex (districts within Hampshire, Dorset, Southampton, Portsmouth and the Isle of Wight). We were provided with introductions to appropriate members of staff in the council and local food aid coordinators through members of the research team, in a snowball sampling approach. We wanted to speak with people who worked directly with people accessing food aid and colleagues who worked in aligned areas of local government such as welfare provision and public health. The research was granted ethical approval by the University of xx (blinded for peer review) Ethics and Research Governance Online (ref 55822.A1).

Here, as part of a wider project, we updated the earlier 2018 measure (referred to now as the Simple Index) with newer data (Department for Work and Pensions benefit claimant counts from May 2020) to produce updated local maps of estimated risk. We conducted initial semi-structured interviews with local stakeholders ( $n = 14$ ) across Wessex and email discussions with regional and national level policy colleagues and contacts in other local authorities.

Interviews were conducted using Microsoft Teams by two researchers (GG and DMS), transcribed and key recurring themes were identified from the transcripts using thematic analysis [55]. These themes are noted below and extended in the Results. As part of the interviews and wider email contacts, participants were asked to look at an MSOA level map of the Simple Index and comment on whether the risk pattern in their local area reflected what they observed in their roles as food aid coordinators, local government leads for food poverty or welfare benefits. Interviewees were also asked for their observations about clients accessing services for food aid to gain insight into the demographic characteristics of households accessing support. Example questions included “Tell me about your role in this organisation; do you work directly with people who are experiencing food poverty?; Has demand for emergency assistance changed over the last year or so, and also before the Covid pandemic?; Please tell us about the people who have been coming to your service; are there any common characteristics? Is there any reason you hear about that leads people to ask for help and support?” We shared maps of the Simple Index and asked if the map of food insecurity risk showed the pattern of population risk they would expect. We used the insights from these qualitative interviews and the ongoing discussions held with colleagues working in public health or policy as the basis for updating the risk measures. The variable selection was informed by these interviews and discussion as well as newer literature available in the topic area [37, 39]. After the new measures were created, we circulated updated maps to our stakeholders and asked for their reflections on which measures aligned to their observations to inform our model choice and recommendations. Feedback was provided at their convenience, through email or meetings.

Interviewees reported the most frequent household structure, size and employment and benefit claiming status of people accessing or seeking support for food insecurity. Common themes included access to employment, transportation, digital exclusion, cost of food, cost of housing, energy bills; the last three factors are all linked to lower incomes. Further recurring themes were poor health including mental health, disability and lack of skills needed for better paid employment. The issue of spatial scale was raised as a barrier to accurately representing the populations at risk, so we revised the approach to use smaller areas (LSOA).



## Updated data resources

We next undertook a scoping exercise to identify relevant data to consider for inclusion in this risk measure. The previous food insecurity risk measure was developed from a literature review of studies that explored self-reported food insecurity, including Kneafsey and colleagues [56]. The original measure included two domains of data: demographic characteristics of people at higher risk and the population claiming welfare benefits, all expressed as a percentage of the population living within MSOAs. Higher risk included people aged 65 years and over who lived alone or those under the age of 65 who are on low incomes and have dependent children, as a percentage of the relevant population. An interim update in 2020 added single adult households under the age of 65 on a low income. More recent literature identified further sociodemographic indicators of food insecurity risk including poor mental health and disability [37, 57].

We first updated the Simple Index with the most recent data for 2021, at the LSOA scale requested by interviewees. This consisted of two domains. First, the percentage of individuals in an LSOA receiving any welfare benefits appropriate for their age group, sourced from the Department for Work and Pensions datasets (see <https://stat-xplore.dwp.gov.uk/webapi/jsf/login.xhtml>). These datasets avoid any double-counting of benefit recipients by taking account of all possible benefit combinations. The second domain was household composition which included the percentage of lone pensioners (here, people aged 65 and over) or in the under 65 population, low-income households with lone individuals or with dependent children. Low income was defined by using Census 2011 data on the National Statistics Socio-economic Classification (NS-SEC) where the household representative person was employed in the three categories of semi-routine occupations, routine occupations or never worked and long-term unemployed (Table QS608EW).

A Complex Index was developed using further indicators identified through the interviews and literature review. We considered two categories of additional factors: Compositional, focusing on population characteristics, and Structural, which describe attributes of the LSOAs such as access to services.

The Compositional Domain includes the Simple Index composed of benefit claimants and household demographics. This is extended with the inclusion of the percentage of individuals without any educational qualifications (from the Census 2011 table LC5102EW) and the LSOA-level mental health score derived from the Mood and Anxiety component of the IMD 2019 health domain [46].

The Structural Domain includes geographical barriers that directly or indirectly impact food insecurity risk. This includes restrictions produced by public transport reliance with indicators for distance to larger food stores, travel time to employment centres and bus stop density. Indirect structural impacts on economic status are considered through local internet speeds (digital exclusion). All of these align with themes from the interviews around cost of living and access to services or employment.

The inclusion of these indicators was based on the scientific literature and stakeholder interviews as described above. The overall aim was to produce a composite index of risk to enable ranking of neighbourhoods using multiple data sources that are open access, can be quickly updated and easily interpreted.

## Data collection and preparation

Data for the indicators were collected from open sources at the area level closest to LSOA for England (n 32,844 areas) and the most recent data published.

Table 1. Simple index domains and indicators.

| Domain                  | Indicators                                                                                                    | Source              | Original Resolution |
|-------------------------|---------------------------------------------------------------------------------------------------------------|---------------------|---------------------|
| Benefit claimants (50%) | Claimants of benefits, age 16–64 (%)                                                                          | DWP, March–May 2020 | LSOA                |
|                         | Claimants of benefits, age 65+ (%)                                                                            |                     |                     |
| Household type(50%)     | Persons on low income and either living alone, or living in a household with dependent children, age 0–64 (%) | Census 2011         | LSOA                |
|                         | Living alone, age 65+ (%)                                                                                     | Census 2011         | LSOA                |

<https://doi.org/10.1371/journal.pone.0267260.t001>

For the Simple Index, which follows the example from [11], benefit claimant data were updated from the Department of Work and Pensions (DWP) for 2020 using the ONS mid-year population estimate for 2019 (all ages) as its denominator, as some benefits may be claimed on behalf of children under age 16. The data were extracted for Benefit Combinations, Working Age Caseload and State Pension Age Caseload. Benefit data are for the previous three months, ending May 2020. Although this time period captures the beginning of the 2020 Covid-19 Pandemic, further analyses with datasets over several years showed little change in the ranking of LSOAs based on the prevalence of benefit claimants. These data were the most up to date at the time the indicator was developed. Household composition data originated from the Census 2011, using two tables to calculate a joint probability of people under age 65 to be in a low-income household (from table QS608EW) either as a single adult or with dependent children (from table DC1109EW). This is summarised in Table 1.

For the Complex Index, multiple sources of data were consulted. For the Compositional Domain this included the two indicators from the Simple index, the Census 2011 table for highest educational qualification (Table LC5102EW) and the IMD 2019 data for LSOA level Mood and Anxiety disorders indicator. This IMD composite indicator includes data from hospital episode statistics, prescription data and suicide mortality rates to provide a broad measure of mental ill health in local areas [46]. We explored options to include Black, Asian and Minority Ethnic (BAME) populations from the 2011 Census as one indicator. We did not use it in this Domain because in earlier assessments it did not correlate well with our validation data.

For the Structural Domain, data were collected with a focus on access via public transport (bus, train, walking) to highlight access deprivation produced from not owning a car. This includes travel time to job centres of more than 100 employees for the working age population, originally derived from the ONS Business Register Employment Survey [58]. Median download speed was derived from annual statistics provided by Ofcom [59]. Although this measure includes business connections download speed was chosen over a measure of residential service availability as the majority of homes were above the Universal Service Obligation (>10Mbit/s download speed) and users may not be able to pay for the fastest internet speeds available in their area [59].

A count of bus stops per square km was created using point data [60] to account for the variation in area size of LSOAs, where the locations of bus stops were projected into LSOA boundaries. The Euclidean distance to medium and large grocery stores from population-weighted centroids was derived from open data provided by Geolytix, a private data company [61]. The use of larger stores was based on previous research showing that smaller format stores provide limited choice or quality often at inflated prices [62]. Euclidean distance rather than network distance was used due to computational power. This is not a limitation as the two measures (Euclidean and network distance) are strongly correlated in urban settings [63]. The indicators of the Complex index are summarised in Table 2.



Table 2. Complex index domains and indicators.

| Domain                                           | Indicators                                                                                                    | Source                                                   | Original Resolution |
|--------------------------------------------------|---------------------------------------------------------------------------------------------------------------|----------------------------------------------------------|---------------------|
| Compositional (individual characteristics) (50%) | Claimants of benefits, age 16+ (%)                                                                            | DWP May 2020 Working age and Pension Age claimant groups | LSOA                |
|                                                  | Persons on low income and either living alone, or living in a household with dependent children, all ages (%) | Census 2011                                              | LSOA                |
|                                                  | Persons with no educational qualifications, age 16+ (%)                                                       | Census 2011                                              | LSOA                |
|                                                  | Mental ill health, composite                                                                                  | IMD 2019                                                 | LSOA                |
| Structural (area characteristics) (50%)          | Minutes to nearest employment centre (size 100+ jobs) by public transport (bus, train), age 16–74             | Department for Transport 2017                            | LSOA                |
|                                                  | Median download speed Mbit/s by connections in an area                                                        | Ofcom Fixed performance data 2020                        | OA                  |
|                                                  | Bus stops per km <sup>2</sup> using LSOA area size from the ONS                                               | National public transport access node (NaPTAN) 2020      | Coordinates         |
|                                                  | Distance (Euclidean km) to medium and large grocery stores (1,400m <sup>2</sup> +)                            | Geolytix Retail Points 2021                              | Coordinates         |

<https://doi.org/10.1371/journal.pone.0267260.t002>

Although we developed a housing affordability indicator using median house price paid at the LSOA level and average income data at the MSOA level [64] this indicator was not used as it was found to skew the outcomes towards unaffordability in high income areas and affordable housing available in low-income areas. The IMD housing affordability indicator was not used as it represents only the under age 40 population [46] and other housing statistics such as rental prices were not available at LSOA level, or had high levels of missing data.

## Data processing

When all indicator data was prepared at the LSOA level each indicator's data was transformed to a normal distribution using the Rankit method. This is a rank-based inverse normal transformation [65]. This step was to prepare data from different sources using different denominators to be combined into a single domain by being transformed into scores. All indicators were normalised in the same direction so that the smallest score value represents the theorised most risk of food insecurity for that indicator. For example, the LSOA with the lowest count of bus stops and longest distance to stores would each represent the smallest score for those indicators. For the mental health indicator, the Mood and Anxiety score from the IMD (where deprivation is indicated by the highest score in this index) was normalised to match the direction of other scores with the smallest score indicating the highest risk of mental ill health.

Relevant indicator scores were summed for each LSOA to produce a domain score. Equal weighting of scores was chosen due to a lack of evidence suggesting a greater emphasis on any particular measure [66]. Domain scores were prepared for combining into an index using an exponential transformation, as used in the creation of the IMD and elsewhere [65]. This was applied to reduce any cancellation effects whereby low risk scores in one domain may 'cancel' high risk scores in the second domain. This transformation also emphasises LSOAs at higher risk of food insecurity which facilitates identification. The exponential transformation of a domain score ( $X$ ) is calculated as follows:

$$X = -23 * \ln(1 - \text{DomainScore} * (1 - \exp(-100/23))) \quad (1)$$

Where 'LN' denotes the natural logarithm and 'EXP' the exponential or antilog transformation. 23 is the scaling constant to minimise cancellation.

The exponentially transformed domain scores are then added together to produce a composite index score using equal weighting (Complex Index). This score is then ranked for each

LSOA where 1 represents the lowest score and therefore the population most at risk of food insecurity. This ranking provides a more interpretable scale of the risk of food insecurity for a multi-dimensional index than its score. For areas with identical risk scores, the lowest applicable rank is applied to both areas. Data were processed using SPSS Ver. 26.

## Validation

The Simple Index, Complex Index and its domains were compared with other relevant indicators and outcomes known to be associated with food insecurity to assess validity by comparing their LSOA ranks with our developed index rank [66] (Table 3). This includes the rank of IMD 2019 already at LSOA level as well as two further variables associated with household food insecurity, child obesity prevalence and free school meal uptake.

The previous index was validated using data on child weight and the 2015 IMD score, as there is a known relationship between material and social deprivation, as measured in the IMD, and food insecurity [68]. Childhood obesity is associated with food insecurity [69–71], due to the quality of food available in food insecure households. Access to free school meals in England is based on household income and benefits claimed including Income Support or Child Tax Credit. This also includes Universal Credit, but household income must be below £7,400 a year if applying after April 2018 (See <https://www.gov.uk/apply-free-school-meals>). Recent research reported an association between receiving free school meals and use of food banks [39], with the use of food banks often used as an indicator of household food insecurity. However, due to the relatively low uptake of food banks in households otherwise classified as food insecure in Canada [54, 72], food bank use is not used as a proxy measure for food insecurity in this study.

Measures of the percentage of child obesity (year 6, average value across three years 2015–18 from National Child Measurement Programme) and percentage of pupils eligible for free school meals (2016) were only available at MSOA level as shown in Table 3. For comparison with these two indicators, our index was aggregated to MSOA level. This was developed through the summation of exponentially transformed domain scores at LSOA level to their relevant MSOA as indicated in area lookup tables provided by the ONS. This MSOA level index and validation indicators were ranked with 1 being the MSOA with the least desirable outcomes for any variable (highest risk of food insecurity, highest prevalence of child obesity) to enable comparison.

Ranks of the Complex Index and its two domains (Compositional and Structural) were compared to ranks of the validation variables. Analysis used Spearman Rank correlation for non-parametric scales. Deciles of ranks were also developed for comparison categorically using Chi-square tests ( $\chi^2$ ). One of the concerns raised by previous researchers is the ability of indices to reflect both urban and rural populations [48]. To assess the fit of our measures we repeated the correlation and chi-squared analysis for all LSOAs and then those classified as urban and those classified as rural as defined by the ONS 2011 [73]. Intraclass correlation

**Table 3. Validation measures.**

| Measures                                                        | Source                                                  | Original Resolution |
|-----------------------------------------------------------------|---------------------------------------------------------|---------------------|
| Index of Multiple Deprivation 2019                              | Ministry of Housing, Communities & Local Government     | LSOA                |
| Child obesity in Year 6 (age 10 and 11 years) % of all children | National Child Measurement Program 2015/16-2017/18      | MSOA                |
| Free School Meals % of all eligible pupils                      | National Pupil Database via Education Datalab 2016 [67] | MSOA                |

<https://doi.org/10.1371/journal.pone.0267260.t003>

coefficient (ICC) was used to measure agreement between the area ranking of our index and rankings of selected measures for validation. Measures of absolute agreement were estimated using two-way mixed effects models, assuming different fixed observers. The ranks of the individual variables comprising the Compositional and Structural Domains were correlated against their relevant domain rank to ensure variables were correlated in the expected direction.

## Results and discussion

Following the development of the indices and domains (Simple, Complex Indices; Composition and Structural domains of the Complex Index), we assessed how well these outputs aligned with the validation data. With favourable outcomes, and after discussions with stakeholders we have identified a recommended approach to identifying food insecurity risk in most areas of England. Further, we have provided suggestions on mapping the two domains of Compositional and Structural alongside each other in rural areas. The final ranks of LSOAs for the indices and domains are available online at <https://mylocalmap.org.uk/iaahealth/>.

### Themes from interviews

There were common themes from the stakeholder interviews. These included poor (physical and mental) health, low income associated with low skills or education, poor access to resources in rural areas and single adult households. These issues were present before the Covid-19 pandemic disruption though may be exacerbated by the ongoing lockdowns that were still occurring at the time of interviews. The interviews aided the selection of variables as described earlier and indicated that one approach may not reflect the profile of risk in all areas.

Low income and debt were, as expected, the main issue facing people seeking support for food. This could be due to unemployment, a sudden change in situation such the end of a relationship or changes to welfare benefits:

*“...the usual churn of people having issues with their benefits, changing benefits, or yeah, life circumstances, crises, partners leaving. ... (an) increasing number of people who are just not making ends meet even though they are in some form of employment” Stakeholder 1*

*“Debt is a real driver.” Stakeholder 5*

The issue of scale, where the 2018 measure was at MSOA level and could prevent some areas of higher risk being identified, was noted by interviewees. This led us to focus on LSOA level data to address the challenge of areas with higher risk populations being masked within larger MSOAs. This was especially noted where small areas of relative deprivation were near to areas of greater wealth:

*“I think there’s just too many pockets that can’t be captured because of the boundaries.” Stakeholder 4*

*“one of those areas which, as I mentioned, tends to be hidden because of the affluence of (wealthier local town)” Stakeholder 3*

Resources, such as good access to transport, employment, education and digital connectivity were noted in the interviews as increasing the risk of food insecurity. This could be due to the limited opportunities in local areas, where better paid work is located further away and private transport is needed. The need to be online was noted as well, as this is the main option to find out about work or to support educational attainment at all levels:

*“Poor educational skills which goes in sort of is that cycle. Then around trying to escape that poverty cycle. . . Digital poverty, that was a big issue (during lockdown). . . How do you get, how do you get to those places of work? Do you need to buy a car? Yeah, um no public transport. Naturally, it may be further away from the places that work so close to public transport is even more so. . . .” Stakeholder 3*

*“Lots of rural areas we’ve talked about already, high costs of living and maybe fewer job opportunities. . . there is an issue around transport.” Stakeholder 6*

*The barrier includes the social setup of people, many, many people, and I’m generalizing. But (this area) comes bottom for multiple high deprivation areas, for low aspiration, low educational attainment, for we don’t have a really good infrastructure where we have loads of large employers. . . . Yeah, so I think there’s a lot of barriers to employment.” Stakeholder 5*

Mental ill health was noted by several respondents as a common characteristic in people seeking aid. This could be people experiencing a period of depression or longer-term problems with their mental health. Poor mental health is also noted as a barrier to employment, contributing to low income:

*“I would say probably for us it would be those struggling with mental health issues as a high proportion of who we help. Obviously, that covers a vast range of health conditions, but there is. . . lack of comprehension, lack of concentration, lack of hope.” Stakeholder 1*

*“. . . there are health problems, of mental health, physical health problems that make that situation difficult for them to work.” Stakeholder 2*

*“. . . lot of the people I speak with are either depressed or (have) mental health issues and feel stuck. . . They may be on a long, long waiting list for mental health support and not being picked up.” Stakeholder 6*

In addition to low income, which was noted earlier, respondents also identified household size as a relevant household characteristic for people looking for support:

*“It’s generally fair to say a lot of single individual households.” Stakeholder 6 and “we’ve seen more single working individuals.” Stakeholder 4*

This may be in part due to relationship breakdown (discussed earlier), more aid being targeted to families through schools, and the lack of any safety net from another adult potentially contributing financially. Overall, low income was reflected in the measures including benefits claimants and low-income households or low educational attainment (from Census data). The other influences on food insecurity were addressed through additional variables as outlined in [Table 2](#).

### Qualitative assessment of new measures

After we prepared the updated measures and domains, we shared sets of maps with our stakeholders in group meetings or by email to gather feedback on which version reflected their observations of local populations. There was consensus from stakeholders in areas of Wessex that the Compositional domain was an accurate representation of populations seeking support in their localities. This measure is very similar to the original approach that we replicated in the Simple index but has added mental health data and educational attainment as noted above, based on interviews and literature highlighting the importance of these factors [37, 39].

In areas where there is a mix of urban and rural populations, there was agreement among stakeholders that rural areas face different challenges in terms of access to employment, less expensive food, and transport. However, the maps of the Complex index were considered by stakeholders to adjust the measure too far in the direction of this locational disadvantage. The agreed recommendation was to use the Context domain alongside the Composition domain in rural areas to acknowledge the challenges faced by households with fewer resources in areas of relative affluence, where transport is often a barrier to accessing employment or aid:

*“...deprivation enhanced and escalated by the fact that they are in a position there, in an area or living in the town, or a position where those other services which would normally be available are not within reach. Partly because of high costs of living because being in more healthy, wealthy area, but also because other crisis services aren't located there.” Stakeholder 3*

The newer maps were also shared at local meetings with groups of stakeholders who agreed with the recommendation to use the Compositional domain as the main focus, with the Structural domain made available in rural areas. A colleague in the North West of England was able to compare the distribution of food bank parcels in a local authority with the maps and the agreement was good. Where there were minor differences in the (Compositional) measure of food poverty risk in two LSOAs, it was suggested that this was likely due to distance from the food bank being a barrier to accessing the food aid. The aim of the measure has always been to explore risk instead of food aid use, given how relatively few households experiencing food insecurity use food banks.

## Quantitative assessment of the measures

Our original index published in 2018 was found to correlate well with the Index of Multiple Deprivation 2015 (IMD), as does this updated Simple Index at a finer resolution for the IMD 2019 ( $r_s = 0.872$ , ICC = 0.932). This is supported by a significant  $\chi^2$  value (51,961), when considering deciles of risk observed in Table 4. The Simple Index also correlated well with the 2016 prevalence of free school meal eligible pupils ( $r_s = 0.812$ ) and year 6 (age 10–11) obesity prevalence ( $r_s = 0.730$ ), when ranked by small areas. This confirms informal observations from local authority teams across the country that our simple measure accurately reflects the areas where more of the population is experiencing food insecurity.

As noted above, the Complex Index and its two domains were assessed for correlation with all LSOAs and then for LSOAs classified as urban and rural areas separately. The Complex Index correlated moderately with the IMD 2019 ( $r_s = 0.659$ ), with a weaker  $\chi^2$  value (19,836) and ICC (0.794) when compared to the Simple Index. The Complex Index also correlated weakly with the percentage of free school meal eligible pupils ( $r_s = 0.393$ ) and year 6 obesity rates ( $r_s = 0.374$ ). When restricted to areas classified as rural, the correlation of the Complex Index with the IMD 2019 improves ( $r_s = 0.754$ , ICC = 0.860) with urban areas slightly less well correlated ( $r_s = 0.716$ , ICC = 0.843). However, urban LSOAs  $\chi^2$  values are similar to the Complex Index (19,778) with rural area  $\chi^2$  values much smaller but still significant (4,592).

Considering the separate domains, the Compositional Domain for all areas ( $r_s = 0.844$ , ICC = 0.915), and for urban areas alone ( $r_s = 0.862$ , ICC = 0.926), correlates very well with the IMD 2019 and is supported by  $\chi^2$  values close to that found for the Simple Index (domain  $\chi^2 = 47,044$ ) (Table 4). For rural areas alone, the Compositional Domain is more moderately correlated ( $r_s = 0.659$ ) with a small but significant  $\chi^2$  value (3,969). The Compositional Domain demonstrates a stronger correlation with free school meals ( $r_s = 0.705$ ) and obesity rates ( $r_s = 0.641$ ) compared to the Complex Index.

Table 4. Validation results.

| Measure                |          | Complex Index Domains |                     |                      |                          |
|------------------------|----------|-----------------------|---------------------|----------------------|--------------------------|
|                        |          | Simple Index          | Complex Index       | Compositional Domain | Structural Domain        |
| IMD 2019               | $r_s$    | 0.872                 | 0.659               | 0.844                | -0.349                   |
|                        | $\chi^2$ | 51961                 | 19836               | 47044                | 5249 $p < 0.0001$        |
|                        | ICC      | 0.932 (0.930–0.933)   | 0.794 (0.790–0.799) | 0.915 (0.914–0.917)  | -1.074 (-1.119 - -1.030) |
| Free School Meals %    | $r_s$    | 0.812                 | 0.393               | 0.705                | -0.312                   |
|                        | $\chi^2$ | 8330                  | 1397                | 5288                 | 802 $p < 0.0001$         |
|                        | ICC      | 0.897 (0.891–0.901)   | 0.565 (0.544–0.585) | 0.827 (0.818–0.835)  | -0.905 (-0.998 - -0.816) |
| Child Obesity %        | $r_s$    | 0.730                 | 0.374               | 0.641                | -0.251                   |
|                        | $\chi^2$ | 4797                  | 1209                | 3486                 | 544 $p < 0.0001$         |
|                        | ICC      | 0.844 (0.836–0.851)   | 0.544 (0.522–0.565) | 0.781 (0.770–0.791)  | -0.671 (-0.753 - -0.593) |
| IMD 2019 (Urban areas) | $r_s$    |                       | 0.716               | 0.862                | -0.330                   |
|                        | $\chi^2$ |                       | 19778               | 41258                | 3087 $p < 0.0001$        |
|                        | ICC      |                       | 0.843 (0.830–0.838) | 0.926 (0.924–0.928)  | -0.984 (-1.031 - -0.937) |
| IMD 2019 (Rural areas) | $r_s$    |                       | 0.754               | 0.659                | 0.167                    |
|                        | $\chi^2$ |                       | 4592                | 3969                 | 897 $p < 0.0001$         |
|                        | ICC      |                       | 0.860 (0.852–0.867) | 0.794 (0.783–0.805)  | 0.286 (0.247–0.322)      |

$r_s$ : Spearman Rank,  $\chi^2$ : Chi-square ICC: Intra-class correlation

<https://doi.org/10.1371/journal.pone.0267260.t004>

The Structural Domain alone is negatively correlated with validation measures, except the IMD 2019 in rural areas ( $r_s = 0.167$ ,  $ICC = 0.286$ ), and has weak correlation and small, but still significant,  $\chi^2$  values with all validation measures.

For the Simple Index, 26% of areas in the top decile of risk were in the North West with 97% of these areas classified as urban. For the Complex Index, neighbourhoods in the top 10% most at risk ( $n = 3284$ ) were found across all regions of England with the highest percentage in the North West (25.5%). In this top decile, 74.4% were in urban areas. For the top decile of risk in the Compositional Domain, 32.5% of the LSOAs were located in the North West region with 96% in urban areas. For the top decile of the rural only index, highest risk LSOAs were more often in the East of England.

As part of the preparation of this updated index we shared the resulting maps with our stakeholders and asked for feedback about which aligned best with their local knowledge. Across all areas of Wessex and Lancaster, the most accurate maps were identified as the Compositional Domain. We have mapped these results below in Fig 1. Indices data are available in S1 File.

Our recommendation is for most teams working in local authorities, or in the third sector, to use the Compositional Domain as the primary measure when exploring patterns of food insecurity risk in their local populations. Given the impact on food security that access to amenities and services can have in rural locations [74], we suggest that a map of the Structural Domain is included alongside the Compositional Domain in these areas. The Structural domain as part of the Complex measure emphasises structural factors of public transport, access to stores and faster internet connections and employment. These will present a larger challenge for more rural locations, however, these are very real challenges for people living in rural areas as we heard from interviewees.

## Discussion

Updated indices of household food insecurity risk were collaboratively developed to support charities, health and public sector (especially local government) organisations. The



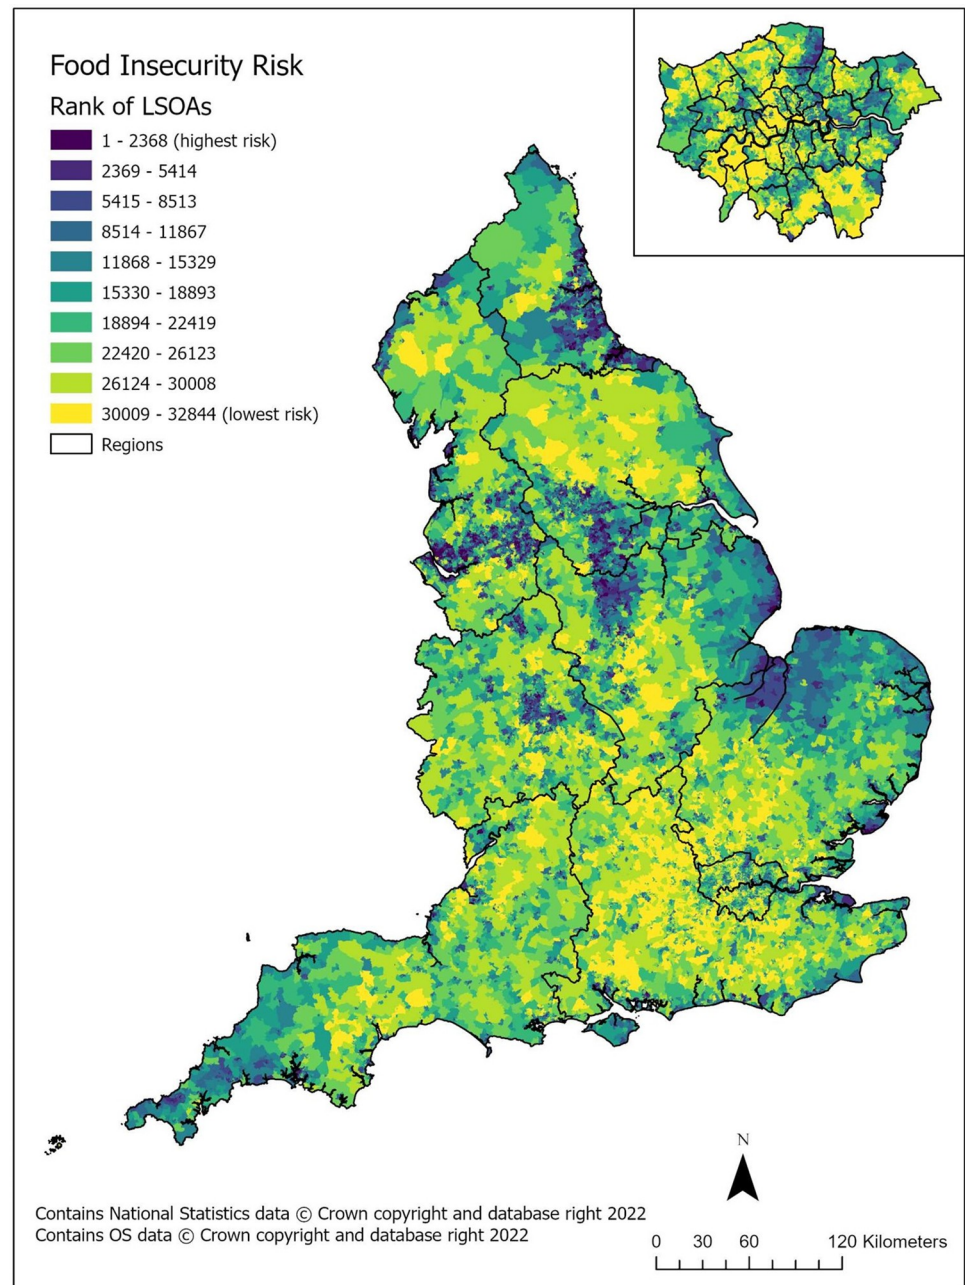

**Fig 1. Food insecurity risk (compositional domain) in England by LSOA, deciles, including region boundaries.** Inset map of London. Reprinted from the UK Data Service under a CC BY license, with permission from National Statistics and OS, original copyright 2022.

<https://doi.org/10.1371/journal.pone.0267260.g001>

development of these indices were informed by a scoping review, similar to AHAH [51], and in discussion with end users, like the rural IMD update [48]. After consultation with stakeholders, a series of indicators were assessed for inclusion in an updated measure. The main criteria were relevance to published research on social and demographic predictors of household food insecurity and for the data to be open access to facilitate regular updates of the new

indices. Some flexibility to reflect risk in urban and rural settings was desired, as often multidimensional deprivation indices are more focused on the urban experience [48]. The full list of possible variables was reduced on the basis of completeness of datasets, availability of LSOA-level data and the impact on modelled correlation, ICC and chi-squared analyses with variables related to poverty, such as the IMD.

The resulting options have been shared with our stakeholders and wider network, with enthusiasm for the new resources that capture more aspects of the circumstances which contribute to household food insecurity, such as mental health. This is confirmed in our approach to validation and is consistent with previous research into the contributing factors of food insecurity which identifies poorer mental health as a risk for household food insecurity [30, 33, 75–77]. Educational attainment was the other new variable added to our recommended Domain (Compositional), which was a common theme from our stakeholder interviews and confirmed in the literature as well [37]. Here it represents limited options for higher earnings, improved employment as we selected the prevalence of the population with no educational qualifications. The original components of the 2018 index remained relevant, benefit claimants being consistently more likely to access food aid, at times due to challenges with benefit claims [57, 77–79].

Further considerations that arose from the interviews were the geographic inequalities/location disadvantage that contributed to food insecurity, particularly in more rural settings. These included the cost of housing, access to transportation and access to appropriate employment. As part of this, the ‘digital divide’ which describes limited access to the internet was reported. We compiled data to reflect these structural factors and were able to develop a domain that represents these challenges in accessing affordable food, public transportation, online access and employment opportunities. Although not included in the measure recommended for most areas (Compositional Domain) this Structural Domain does capture similar data as the updated rural IMD score developed in Norfolk [48] and is aligned with the AHAH index that reflects local physical environments and amenities [51, 65]. The inclusion of the AHAH measure in national resources (PHE Fingertips provided by the Office for Health Improvement and Disparities [OHID]) demonstrates the relevance of using built environment data for planning and policy, where there is concern for public health.

Selecting the most appropriate measure was informed by the validation process and consultation. The Complex Index reveals that most areas are not in the highest decile of risk for both Compositional and Structural domains. Rural areas may be at risk structurally, but residents may be able to offset the issues caused by a longer distance to services where there is *reduced* household economic risk. For example, if households have access to a car, then public transport is likely to be less essential. This reflects an issue of locational disadvantage for residents of areas where most households are better off financially, as there are fewer resources to offer support for those who do need it. Our suggestion is for the Composition Domain to be applied in most areas, as it adds further data from the Simple Index and was identified as fitting well with local knowledge when shared with wider audiences across England.

A challenge with any area-based measure is that areas and their populations are classified in a way that may miss individual experiences. We are aware that rural areas may have a high prevalence of wealthier households, however, there will be pockets of deprivation that are masked when using composite risk scores. In rural areas this may pose an even larger problem for households facing difficulties both due to the lack of access to support noted above and the inability to anonymously seek assistance. Households in urban settings may have better access due to a higher concentration of food aid or welfare advice resources, also better links for public transport for households without cars.

## Strengths and limitations

Using several data sources in the Complex Index reduces the bias that may be produced from considering only one dimension of food insecurity risk. The variables included are sourced predominantly from open access validated governmental statistics and data. We assessed a wide range of variables for suitability as outlined above and drew upon a network of contacts to ensure the resulting indices were applicable in densely populated urban settings as well as sparse rural areas, and diverse populations. Feedback was gained from a wider audience outside of Wessex and the South East at seminars and presentations to audiences in London and online between December 2019 and April 2021. This work reached colleagues in all regions of England and international audiences, facilitating discussion of the indices for applicability across the country.

Data are available to download or map using a website (blinded for peer review). This was co-developed with third sector and local government partners to enable access to the data and resources for visualisation where mapping software and expertise is not easily available. This will allow uptake by more organisations, supporting the further inclusion of these risk indices in annual reports such as Joint Strategic Needs Assessments (JSNAs) or funding applications for food aid interventions. Correspondence with users of the indices suggest these are key applications of the data (private correspondence, January 2021).

As with any small area measure, there are limitations. DWP data applies statistical disclosure which may impact the accuracy of percentage calculations for benefit claimants. However, this is partially addressed as we do not use raw data in our development of indices. Three variables (qualifications, household structure, low-income households,) were informed by the 2011 Census that will benefit from updates from the more recent census as it becomes available; the risk indices are updated annually in September. The 2019 IMD score includes one data point (mental health) also included in this measure, so there is minimal risk of collinearity in the validation process. However, the mental health indicator in the IMD score comprises only 2.3% of the overall score for an LSOA. Benefits claimant data included in the 2019 IMD score are from a different time period and for specific benefit types only [46].

The ranking of an LSOA is not an absolute measure of household food insecurity but can be used to compare against the ranking of other LSOAs, particularly useful for illustrating areas at relatively higher risk. Although the indices are measured at the local neighbourhood level, the LSOA rank may not reflect the situation of every local resident.

## Conclusions

The work presented here provides an important update and improvement on an earlier measure of food insecurity risk using a finer local scale and greater flexibility in the data used to assess risk in local areas. Initial discussions with stakeholders in local and national government (as part of the scoping for this research) highlighted the need for a measure at the same scale as the IMD, to provide the specificity required in local areas. These risk indices can be adapted for other settings, including the other nations of the UK or countries including Australia and New Zealand. Data such as number of benefits claimants in an area are updated regularly, and as a result the indices are updated annually.

Household food insecurity is a problem facing many households in England. Longer term solutions to the situation are needed, including supporting households to maximise their incomes and addressing structural barriers to food security. In the shorter term there is a proliferation of food aid and assistance offered across local areas; this research supports decision-makers to target assistance where it is likely to be most needed.

## Supporting information

**S1 File. LSOA ranks for food insecurity risk measures.** The file includes ranks for all LSOAs by Simple Index, Complex Index and the Compositional and Structural domains; an additional tab provides a data dictionary. (XLSX)

## Acknowledgments

We would like to thank all participants in this study for their time and engagement with the interviews and further conversations. Thank you to Daniel Clarkson for assessment of the maps against food aid distributions. The views expressed in this publication are those of the author(s) and not necessarily those of the National Institute for Health and Care Research or the Department of Health and Social Care.

## Author Contributions

**Conceptualization:** Dianna M. Smith, Paul Roderick, Nisreen A. Alwan.

**Data curation:** Dianna M. Smith, Lauren Rixson.

**Formal analysis:** Lauren Rixson.

**Funding acquisition:** Dianna M. Smith, Nisreen A. Alwan.

**Investigation:** Grace Grove, Nida Ziauddeen, Ravita Taheem.

**Methodology:** Dianna M. Smith, Lauren Rixson, Ivaylo Vassilev.

**Supervision:** Dianna M. Smith.

**Writing – original draft:** Dianna M. Smith, Lauren Rixson.

**Writing – review & editing:** Dianna M. Smith, Lauren Rixson, Grace Grove, Nida Ziauddeen, Ivaylo Vassilev, Ravita Taheem, Paul Roderick, Nisreen A. Alwan.

## References

1. Nations U. Sustainable Development Goals. Available from: <https://sdgs.un.org/goals>.
2. Environmental Audit Committee HoC. Sustainable Development Goals in the UK follow up: Hunger, malnutrition and food insecurity in the UK. 2019.
3. Bramley G, Treanor M, Sosenko F, Littlewood M. State of Hunger: Building the evidence on poverty, destitution, and food insecurity in the UK. The Trussell Trust; 2021.
4. Department for Environment Food and Rural Affairs. United Kingdom Food Security Report 2021. 2021.
5. The Food Foundation. The Impact of Covid-19 on Household Food Security. 2021.
6. Cummins S, Macintyre S. "Food deserts"—evidence and assumption in health policy making. *BMJ*. 2002; 325(7361):436–8. <https://doi.org/10.1136/bmj.325.7361.436> PMID: 12193363
7. Blake MK. More than Just Food: Food Insecurity and Resilient Place Making through Community Self-Organising. *Sustainability*. 2019; 11(10):2942.
8. Thompson C, Lewis DJ, Greenhalgh T, Smith NR, Fahy AE, Cummins S. "I don't know how I'm still standing" a Bakhtinian analysis of social housing and health narratives in East London. *Social Science & Medicine*. 2017; 177(Supplement C):27–34. <https://doi.org/10.1016/j.socscimed.2017.01.054> PMID: 28157566
9. A UK right to food law could tackle food poverty and environmental degradation [press release]. University of Bristol 2018.
10. Gray M, Barford A. The depths of the cuts: the uneven geography of local government austerity. *Cambridge Journal of Regions, Economy and Society*. 2018; 11(3):541–63.

11. Smith D, Thompson C, Harland K, Parker S, Shelton N. Identifying populations and areas at greatest risk of household food insecurity in England. *Applied Geography*. 2018; 91:21–31. <https://doi.org/10.1016/j.apgeog.2017.12.022> PMID: 29915447
12. All-Party Parliamentary Inquiry into Hunger in the United Kingdom. *Feeding Britain: A strategy for zero hunger in England, Wales, Scotland and Northern Ireland.*; 2014.
13. Scott K. Happiness on your doorstep: disputing the boundaries of wellbeing and localism. *The Geographical Journal*. 2015; 181(2):129–37.
14. Marmot M. *Marmot Review 10 years on.* 2020.
15. Marmot M, Goldblatt P, Allen J. *Fair society, healthy lives.* 2010.
16. Kontopantelis E, Mamas MA, van Marwijk H, Ryan AM, Buchan IE, Ashcroft DM, et al. Geographical epidemiology of health and overall deprivation in England, its changes and persistence from 2004 to 2015: a longitudinal spatial population study. *Journal of Epidemiology and Community Health*. 2018; 72(2):140–7. <https://doi.org/10.1136/jech-2017-209999> PMID: 29263178
17. Moon G, Quarendon G, Barnard S, Twigg L, Blyth B. Fat nation: Deciphering the distinctive geographies of obesity in England. *Social Science & Medicine*. 2007; 65(1):20–31. <https://doi.org/10.1016/j.socscimed.2007.02.046> PMID: 17467130
18. Wheeler BW, White M, Stahl-Timmins W, Depledge MH. Does living by the coast improve health and wellbeing? *Health & Place*. 2012; 18(5):1198–201. <https://doi.org/10.1016/j.healthplace.2012.06.015> PMID: 22796370
19. Allan R, Williamson P, Kulu H. Unravelling urban–rural health disparities in England. *Population, Space and Place*. 2017; 23(8):e2073.
20. Ginja S, Jackson K, Newham JJ, Henderson EJ, Smart D, Lingam R. Rural-urban differences in the mental health of perinatal women: a UK-based cross-sectional study. *BMC Pregnancy and Childbirth*. 2020; 20(1):464. <https://doi.org/10.1186/s12884-020-03132-2> PMID: 32795335
21. Gundersen C, Ziliak JP. Food Insecurity And Health Outcomes. *Health Affairs*. 2015; 34(11):1830–9. <https://doi.org/10.1377/hlthaff.2015.0645> PMID: 26526240
22. Dong T, Harris K, Freedman D, Janus S, Griggs S, Iyer Y, et al. Food Insecurity and Atherosclerotic Cardiovascular Disease Risk in Adults with Diabetes. *Nutrition*. 2022:111865.
23. Pourmotabbed A, Moradi S, Babaei A, Ghavami A, Mohammadi H, Jalili C, et al. Food insecurity and mental health: a systematic review and meta-analysis. *Public Health Nutr*. 2020; 23(10):1778–90. <https://doi.org/10.1017/S136898001900435X> PMID: 32174292
24. Men F, Elgar FJ, Tarasuk V. Food insecurity is associated with mental health problems among Canadian youth. *Journal of Epidemiology and Community Health*. 2021; 75(8):741–8. <https://doi.org/10.1136/jech-2020-216149> PMID: 33579754
25. Cain KS, Meyer SC, Cummer E, Patel KK, Casacchia NJ, Montez K, et al. Association of Food Insecurity with Mental Health Outcomes in Parents and Children. *Academic Pediatrics*. 2022; 22(7):1105–14. <https://doi.org/10.1016/j.acap.2022.04.010> PMID: 35577282
26. Fleming MA, Kane WJ, Meneveau MO, Ballantyne CC, Levin DE. Food Insecurity and Obesity in US Adolescents: A Population-Based Analysis. *Child Obes*. 2021; 17(2):110–5. <https://doi.org/10.1089/chi.2020.0158> PMID: 33481662
27. Franklin B, Jones A, Love D, Puckett S, Macklin J, White-Means S. Exploring mediators of food insecurity and obesity: a review of recent literature. *J Community Health*. 2012; 37(1):253–64. <https://doi.org/10.1007/s10900-011-9420-4> PMID: 21644024
28. Leung CW, Epel ES, Ritchie LD, Crawford PB, Laraia BA. Food insecurity is inversely associated with diet quality of lower-income adults. *Journal of the Academy of Nutrition and Dietetics*. 2014; 114(12):1943–53.e2. <https://doi.org/10.1016/j.jand.2014.06.353> PMID: 25091796
29. Morris MA, Hulme C, Clarke GP, Edwards KL, Cade JE. What is the cost of a healthy diet? Using diet data from the UK Women's Cohort Study. *Journal of Epidemiology and Community Health* (1979-). 2014; 68(11):1043–9. <https://doi.org/10.1136/jech-2014-204039> PMID: 25053614
30. Maynard M, Andrade L, Packull-McCormick S, Perlman CM, Leos-Toro C, Kirkpatrick SI. Food Insecurity and Mental Health among Females in High-Income Countries. *Int J Environ Res Public Health*. 2018; 15(7):1424. <https://doi.org/10.3390/ijerph15071424> PMID: 29986420
31. Elgar FJ, Pickett W, Pförtner TK, Gariépy G, Gordon D, Georgiades K, et al. Relative food insecurity, mental health and wellbeing in 160 countries. *Social science & medicine* (1982). 2021; 268:113556. <https://doi.org/10.1016/j.socscimed.2020.113556> PMID: 33293171
32. Power M, Uphoff E, Kelly B, Pickett KE. Food insecurity and mental health: an analysis of routine primary care data of pregnant women in the Born in Bradford cohort. *Journal of Epidemiology and Community Health*. 2017; 71(4):324–8. <https://doi.org/10.1136/jech-2016-207799> PMID: 28275045



33. Thompson C, Smith D, Cummins S. Understanding the health and wellbeing challenges of the food banking system: A qualitative study of food bank users, providers and referrers in London. *Social Science & Medicine*. 2018; 211:95–101.
34. End Hunger UK. Campaign win! UK Government agrees to measure household food insecurity 2019 [Available from: <http://endhungeruk.org/campaign-win-uk-government-agrees-to-measure-household-food-insecurity/>].
35. Foundation Food. Household Food Insecurity: The missing data. 2016.
36. Francis-Devine B, Danechi S, Tyler G. Food poverty: Households, food banks and free school meals. House of Commons Library; 2021.
37. Loopstra R, Reeves A, Tarasuk V. The rise of hunger among low-income households: an analysis of the risks of food insecurity between 2004 and 2016 in a population-based study of UK adults. *Journal of Epidemiology and Community Health*. 2019; 73(7):668–73. <https://doi.org/10.1136/jech-2018-211194> PMID: 31036607
38. Loopstra R. Vulnerability to food insecurity since the COVID-19 lockdown: Preliminary report. 2020.
39. Parnham JC, Lavery AA, Majeed A, Vamos EP. Half of children entitled to free school meals did not have access to the scheme during COVID-19 lockdown in the UK. *Public health*. 2020; 187:161–4. <https://doi.org/10.1016/j.puhe.2020.08.019> PMID: 32980783
40. Pool U, Dooris M. Prevalence of food security in the UK measured by the Food Insecurity Experience Scale. *Journal of Public Health*. 2021.
41. Congdon P. A diabetes risk index for small areas in England. *Health & Place*. 2020; 63:102340. <https://doi.org/10.1016/j.healthplace.2020.102340> PMID: 32543429
42. Ministry of Housing CLG. English indices of deprivation 2019. 2019.
43. Government W. Welsh Index of Multiple Deprivation. 2021.
44. Government S. Scottish Index of Multiple Deprivation 2020. 2020.
45. Noble D, Smith D, Mathur R, Robson J, Greenhalgh T. Feasibility study of geospatial mapping of chronic disease risk to inform public health commissioning. *BMJ Open*. 2012;2(1). <https://doi.org/10.1136/bmjopen-2011-000711> PMID: 22337817
46. McLennan DSN, Noble Michael, Plunkett Emma, Wright Gemma, Gutacker Nils. The English Indices of Deprivation 2019 Technical Report. Ministry of Housing, Communities and Local Government; 2019.
47. Hippisley-Cox J, Coupland C, Robson J, Sheikh A, Brindle P. Predicting risk of type 2 diabetes in England and Wales: prospective derivation and validation of QDScore. *BMJ*. 2009;338. <https://doi.org/10.1136/bmj.b880> PMID: 19297312
48. Burke A, Jones A. The development of an index of rural deprivation: A case study of Norfolk, England. *Social Science & Medicine*. 2019; 227:93–103. <https://doi.org/10.1016/j.socscimed.2018.09.019> PMID: 30528071
49. Richardson EA, Mitchell R, Shortt NK, Pearce J, Dawson TP. Developing Summary Measures of Health-Related Multiple Physical Environmental Deprivation for Epidemiological Research. *Environment and Planning A: Economy and Space*. 2010; 42(7):1650–68.
50. Pearce JR, Richardson EA, Mitchell RJ, Shortt NK. Environmental justice and health: the implications of the socio-spatial distribution of multiple environmental deprivation for health inequalities in the United Kingdom. *Transactions of the Institute of British Geographers*. 2010; 35(4):522–39.
51. Green MA, Daras K, Davies A, Barr B, Singleton A. Developing an openly accessible multi-dimensional small area index of 'Access to Healthy Assets and Hazards' for Great Britain, 2016. *Health & Place*. 2018; 54:11–9. <https://doi.org/10.1016/j.healthplace.2018.08.019> PMID: 30216748
52. Nica-Avram G, Harvey J, Smith G, Smith A, Goulding J. Identifying food insecurity in food sharing networks via machine learning. *Journal of Business Research*. 2021; 131:469–84.
53. Moretti A, Whitworth A, Blake M. UK Local Food Insecurity Methods Briefing. University of Sheffield; 2021.
54. Kirkpatrick SI, Tarasuk V. Food Insecurity and Participation in Community Food Programs among Low-income Toronto Families. *Canadian Journal of Public Health / Revue Canadienne de Sante'e Publique*. 2009; 100(2):135–9. <https://doi.org/10.1007/BF03405523> PMID: 19839291
55. Kiger ME, Varpio L. Thematic analysis of qualitative data: AMEE Guide No. 131. *Medical Teacher*. 2020; 42(8):846–54. <https://doi.org/10.1080/0142159X.2020.1755030> PMID: 32356468
56. Kneafsey M, Dowler E, Lambie-Mumford H, Inman A, Collier R. Consumers and food security: Uncertain or empowered? *Journal of Rural Studies*. 2012; 29:101–12.
57. Loopstra R, Lalor D. Financial insecurity, food insecurity, and disability: The profile of people receiving emergency food assistance from The Trussell Trust Foodbank Network in Britain. 2017 June 2017.



58. Office for National Statistics. Journey times to key services by lower super output area. 2021.
59. Office of Communications. Connected Nations Report. 2020.
60. Department for Transport. National Public Transport Access Node Schema. 2021.
61. Geolytix. Supermarket Retail Points. 2021.
62. Dawson J, Marshall D, Taylor M, Cummins S, Sparks L, Anderson AS. Accessing healthy food: availability and price of a healthy food basket in Scotland. *Journal of Marketing Management*. 2008; 24(9–10):893–913.
63. Burgoine T, Alvanides S, Lake AA. Creating 'obesogenic realities'; do our methodological choices make a difference when measuring the food environment? *International Journal of Health Geographics*. 2013; 12(1):33.
64. Office for National Statistics. Median house prices by lower layer super output area: HPSSA dataset 2021.
65. Daras K, Green MA, Davies A, Barr B, Singleton A. Open data on health-related neighbourhood features in Great Britain. *Scientific Data*. 2019; 6(1):107. <https://doi.org/10.1038/s41597-019-0114-6> PMID: 31263099
66. Allik M, Leyland A, Travassos Ichihara MY, Dundas R. Creating small-area deprivation indices: a guide for stages and options. *Journal of Epidemiology and Community Health*. 2020; 74(1):20–5. <https://doi.org/10.1136/jech-2019-213255> PMID: 31630122
67. Thomson D. Explore England's Changing Free School Meals Rates. Education. In: Datalab, editor. 2017.
68. Benjamin Neelon SE, Burgoine T, Gallis JA, Monsivais P. Spatial analysis of food insecurity and obesity by area-level deprivation in children in early years settings in England. *Spatial and Spatio-temporal Epidemiology*. 2017; 23:1–9. <https://doi.org/10.1016/j.sste.2017.07.001> PMID: 29108687
69. Metallinos-Katsaras E, Must A, Gorman K. A Longitudinal Study of Food Insecurity on Obesity in Pre-school Children. *Journal of the Academy of Nutrition and Dietetics*. 2012; 112(12):1949–58. <https://doi.org/10.1016/j.jand.2012.08.031> PMID: 23174682
70. Coleman-Jensen A, McFall W, Nord M. Food insecurity in households with children prevalence, severity, and household characteristics, 2010–11. USDA; 2013.
71. Oberle MM, Romero Willson S, Gross AC, Kelly AS, Fox CK. Relationships among child eating behaviors and household food insecurity in youth with obesity. *Childhood Obesity*. 2019; 15(5):298–305. <https://doi.org/10.1089/chi.2018.0333> PMID: 31090441
72. Tarasuk V, Fafard St-Germain A-A, Loopstra R. The Relationship Between Food Banks and Food Insecurity: Insights from Canada. *VOLUNTAS: International Journal of Voluntary and Nonprofit Organizations*. 2020; 31(5):841–52.
73. Office for National Statistics. Rural Urban Classification (2011) of Lower Layer Super Output Areas in England and Wales. 2011.
74. England R. Rural Vulnerability and Disadvantage Statement 2020. 2020.
75. Whitaker RC, Phillips SM, Orzol SM. Food insecurity and the risks of depression and anxiety in mothers and behavior problems in their preschool-aged children. *Pediatrics*. 2006; 118(3):e859–68. <https://doi.org/10.1542/peds.2006-0239> PMID: 16950971
76. Tarasuk V, Mitchell A, McLaren L, McIntyre L. Chronic Physical and Mental Health Conditions among Adults May Increase Vulnerability to Household Food Insecurity. *The Journal of Nutrition*. 2013; 143(11):1785–93. <https://doi.org/10.3945/jn.113.178483> PMID: 23986364
77. Garthwaite KA, Collins PJ, Bamba C. Food for thought: an ethnographic study of negotiating ill health and food insecurity in a UK foodbank. *Social science & medicine (1982)*. 2015;132.
78. Lambie-Mumford H, Green MA. Austerity, welfare reform and the rising use of food banks by children in England and Wales. *Area*. 2017; 49(3):273–9.
79. Loopstra R, Fledderjohann J, Reeves A, Stuckler D. Impact of Welfare Benefit Sanctioning on Food Insecurity: a Dynamic Cross-Area Study of Food Bank Usage in the UK. *Journal of Social Policy*. 2018; 47(3):437–57.
